# Supplementary material
Source: publisher figshare collection journal article supplement (https://acs.figshare.com/ndownloader/files/5139427)
Supplement: Supplementary file 1 [file 5139427]

# Supporting Information

## **Organic Thin-Film Transistors Based on Carbonyl- Functionalized Quaterthiophenes. High Mobility N-Channel Semiconductors and Ambipolar Behavior**

*Myung-Han Yoon, Sara A. DiBenedetto, Antonio Facchetti\*, and Tobin J. Marks\**

Department of Chemistry and the Materials Research Center, Northwestern University,  
2145 Sheridan Road, Evanston, Illinois, 60208.

## Materials.

The reagent 2-thiophenylaldehyde and 2-bromothiophene are commercially available. The reagent 5,5'-bis(tri-*n*-butylstannyl)-2,2'-dithiophene was prepared according to the known procedure (Wei, Y.; Yang, Y.; Yeh, J.-M. *Chem. Mater.* **1996**, 8, 2659). Compound **8** was prepared following a known procedure (Brzezinski, J. Z.; Reynolds, J. R. *Synthesis* **2002**, 8, 1053, respectively).

**Synthesis of 5, 5'''-diheptanoyl-2,2':5',2'':5'',2'''-quaterthiophene (DHCO-4T, 1).** A mixture of compound **4** (0.64 g, 2.33 mmol), 5,5'-bis(tri-*n*-butylstannyl)-2,2'-dithiophene (0.744 g, 1.00 mmol), and tetrakis(triphenylphosphine)palladium(0) (0.07 g, 0.06 mmol) in dry DMF (5 mL) was deaerated three times with N<sub>2</sub>. The reaction mixture was stirred overnight at 100 °C during which time a precipitate formed. After cooling, the orange solid was collected by filtration and washed several times with hexane, then MeOH. The solid was recrystallized from xylene and dried in vacuum oven (120 °C) yielding pure compound (0.36 g, 65 %). mp 290 °C; <sup>1</sup>H NMR (CD<sub>2</sub>Cl<sub>2</sub>) δ 7.60 (d, 2H, <sup>2</sup>J=3.6 Hz), 7.25 (d, 2H, <sup>2</sup>J=3.6 Hz), 7.19 (d, 2H, <sup>2</sup>J=3.6 Hz), 7.16 (d, 2H, <sup>2</sup>J=3.6 Hz), 2.85 (t, 4H, <sup>3</sup>J=7.6 Hz), 1.72-1.70 (m, 4H), 1.36-1.31 (m, 12H), 0.88 (t, 4H, <sup>3</sup>J=6.0 Hz); Anal. Calcd for C<sub>30</sub>H<sub>34</sub>O<sub>2</sub>S<sub>4</sub>: C 64.94, H 6.18. Found: C 64.80, H 6.21; MS (EI): *m/z* (%) 553.9 (100) [M<sup>+</sup>]

**Synthesis of 5, 5'''-diperfluorohexylcarbonyl-2,2':5',2'':5'',2'''-quaterthiophene (DFHCO-4T, 2).** A mixture of compound **3** (1.86 g, 3.66 mmol), 5,5'-bis(tri-*n*-butylstannyl)-2,2'-dithiophene (1.36 g, 1.83 mmol), and tetrakis(triphenylphosphine)palladium(0) (0.13 g, 0.11 mmol) in dry DMF (10 mL) was deaerated three times with N<sub>2</sub>. The reaction mixture was stirred overnight at 100 °C during which time a precipitate formed. After cooling, the dark red solid was collected by filtration and washed several times with hexane, then MeOH. Further purification was achieved by gradient vacuum sublimation (1.22 g, 65 %). mp 248 °C; <sup>1</sup>H NMR (CD<sub>2</sub>Cl<sub>2</sub>) 120°C δ 7.93 (2H), 7.39 (2H), 7.32 (2H), 7.27 (2H); <sup>19</sup>F NMR (CD<sub>2</sub>Cl<sub>2</sub>) 120°C δ -79.88 (6F), -113.42 (4F), -120.18 (8F), -121.62 (4F), -124.90 (4F). Anal. Calcd for C<sub>30</sub>H<sub>8</sub>F<sub>26</sub>O<sub>2</sub>S<sub>4</sub>: C 35.24, H 0.79, F 48.30. Found: C 35.13, H 0.84, F 48.51; MS (EI): *m/z* (%) 1021.5 (100) [M<sup>+</sup>].

**Synthesis of 2,7-[bis-(5-perfluorohexylcarbonylthien-2-yl)]-4H-cyclopenta[2,1-*b*:3,4-*b'*]-dithiophen-4-one (DFHCO-4TCO, 3).** Molecule **7** (0.50 g, 0.46 mmol) was dissolved in 75 mL acetic acid while refluxing. After addition of concentrated HCl (2 mL), the solution turned from purple to brown, and a dark green precipitate formed immediately. The reaction was quenched with H<sub>2</sub>O (20 mL). The solution was then decanted off while warm and the product was collected as a dark green solid (0.45 g). The solid was washed with acetone (2 x 10 mL) and chloroform (6 x 10 mL), dried overnight in vacuum oven, and purified by gradient sublimation twice. The pure portion was collected and washed with boiling chloroform (20 mL). The red solution was decanted leaving the product as a black solid. It was washed with chloroform and purified by gradient sublimation (0.265 g, 60 % yield): mp 297 °C; Anal. Calcd for C<sub>31</sub>H<sub>6</sub>F<sub>26</sub>O<sub>3</sub>S<sub>4</sub>: C 35.51, H 0.58. Found: C 35.40, H 0.71; MS (EI, 70 eV) *m/z*: calcd (M<sup>+</sup>) for C<sub>31</sub>H<sub>6</sub>F<sub>26</sub>S<sub>4</sub>O<sub>3</sub>, 1048.0; found, 1048.0.

**Synthesis of 2-heptanoyl-5-bromothiophene (4).** The reagent of 2-bromothiophene (1.63 g, 10.0 mmol) and heptanoyl chloride (1.78g, 12.0 mmol) were dissolved in dry benzene (15 mL) and AlCl<sub>3</sub> was added in portions with stirring over a period of 10 min. The resulting dark brown solution was refluxed for 1 h and left to cool down to room temperature. The reaction mixture was quenched with 2M HCl (15 mL) while carefully stirring. The organic layer was separated, washed with 2M HCl, 2M NaOH, and water, and passed through silica column (d = 3 cm, l = 8 cm). The collected solution was dried over MgSO<sub>4</sub>, and concentrated in vacuo (2.40 g, 87 %). <sup>1</sup>H NMR (CDCl<sub>3</sub>): δ 7.44 (d, 1H, <sup>2</sup>J=3.8 Hz), 7.10 (d, 1H, <sup>2</sup>J=3.8 Hz), 2.81 (t, 2H, <sup>3</sup>J=7.4 Hz), 1.74-1.68 (m, 2H), 1.38-1.23 (m, 6H), 0.89 (t, 3H, <sup>3</sup>J=6.4 Hz); HRMS (EI, 70 eV) *m/z*: calcd (M<sup>+</sup>) for C<sub>11</sub>H<sub>15</sub>BrOS, 274.00; found, 274.0016.

**Synthesis of perfluorohexyl-thien-2-yl-methanol (5).** MeLi (1.6 M, 15.9 mL) was added dropwise to a solution of 5-thiophenyl aldehyde (2.80g, 25.0 mmol) and perfluorohexyliode (11.73 g, 26.3 g) in dry Et<sub>2</sub>O (70mL) at -78 °C with stirring. The mixture was stirred for additional 40 min and quenched with 3N HCl (70 mL). The organic layer was separated, washed with water twice, dried over MgSO<sub>4</sub>, filtered, and concentrated in vacuo. Column chromatography of the residue over silica gel (hexane: ethyl acetate = 1:1) yielded **5** (6.20 g, 57 %). <sup>1</sup>H NMR (CDCl<sub>3</sub>): δ 7.45 (d, 1H, <sup>2</sup>J=4.5 Hz), 7.24 (d, 1H, <sup>2</sup>J=3.0 Hz), 7.10-7.06 (dd, 1H, J=4.5, 3.8 Hz), 5.54-5.46 (m, 1H), 2.56 (d, 1H, <sup>2</sup>J=5.7 Hz); HRMS (EI, 70 eV) *m/z*: calcd (M<sup>+</sup>) for C<sub>11</sub>H<sub>5</sub>F<sub>13</sub>OS, 431.99; found, 431.9838.

**Synthesis of perfluorohexyl-(5-bromothiophen-2-yl)-methanol (6).** Bromine (0.698 g, 4.37 mmol) was added to a solution of **1** (1.80 g, 4.16 mmol) in CH<sub>2</sub>Cl<sub>2</sub> (15 mL). After stirring overnight at room temperature, the mixture was neutralized with saturated aqueous NaHCO<sub>3</sub> solution and extracted with CH<sub>2</sub>Cl<sub>2</sub> (3 x 20 mL). The organic layers were combined, dried over MgSO<sub>4</sub>, filtered, and concentrated in vacuo (1.90 g, 89 %). <sup>1</sup>H NMR (CDCl<sub>3</sub>): δ 7.02 (d, 1H, <sup>2</sup>J=3.7 Hz), 6.97 (d, 1H, <sup>2</sup>J=3.8 Hz), 5.46-5.38 (m, 1H), 2.64 (d, 1H, <sup>2</sup>J=5.2 Hz); HRMS (EI, 70 eV) *m/z*: calcd (M<sup>+</sup>) for C<sub>11</sub>H<sub>4</sub>F<sub>13</sub>BrOS, 509.90; found, 509.8945.

**Synthesis of 2-perfluorohexylcarbonyl-5-bromothiophene (7).** A solution of compound **2** (1.90 g, 3.72 mmol) and activated MnO<sub>2</sub> (5 g) was stirred overnight. The mixture was filtered through Celite. The filtrate was dried over MgSO<sub>4</sub>, and the solvent evaporated in vacuum (1.85 g, 98 %). The mixture was purified by sublimation; mp 27 °C; <sup>1</sup>H NMR (CDCl<sub>3</sub>): δ 7.74 (d, 1H, <sup>2</sup>J=3.8 Hz), 7.23 (d, 1H, <sup>2</sup>J=3.8 Hz); <sup>19</sup>F NMR (CDCl<sub>3</sub>) δ -81.20 (3F), -115.20 (2F), -121.77 (4F), -123.18 (2F), -126.53 (2F); Anal. Calcd for C<sub>11</sub>H<sub>2</sub>BrF<sub>13</sub>OS: C 25.95, H 0.40. Found: C 26.11, H 0.54; MS (EI, 70 eV) *m/z*: (M<sup>+</sup>) calcd for C<sub>11</sub>H<sub>2</sub>BrF<sub>13</sub>OS 509.8; found 509.8.

**Synthesis of spiro[4H-cyclopenta[2,1-b:3,4-b']dithiophene-4,2'-[1,3]dioxolane], 2,6-bis(tri-*n*-butylstannyl) (9).** Spiro[4H-cyclopenta[2,1-b:3,4-b']dithiophene-4,2'-[1,3]dioxolane] (1.71 g, 7.35 mmol) was dissolved in dry THF (20 mL) under nitrogen and cooled to -78°C. Two equivalents of *n*-BuLi were added dropwise (5.92 mL, 14.85 mmol) and the reaction mixture stirred for 30 min. The solution was allowed to warm to room temperature and stirred for an additional 1.5 h. The resulting thick brown suspension was cooled again to -78°C and tri-*n*-butyltin chloride (4.78 g, 14.7 mmol) was added. The solution was then stirred at room temperature for 4 h. The reaction was quenched with 100 mL H<sub>2</sub>O and extracted with hexane. The organic layer was washed with H<sub>2</sub>O (6 x 50 mL) and dried over MgSO<sub>4</sub>. After filtration, evaporation of the solvent left a brown oil (5.7g, 95 % yield): <sup>1</sup>H NMR (CDCl<sub>3</sub>): δ 6.96 (s, 2H), 4.33 (s, 4H), 1.57 (m, 12H), 1.33 (m, 12H), 1.10 (m, 12H), 0.91 (t, 18H, <sup>3</sup>J=6.8 Hz); HRMS (ACPI, CH<sub>2</sub>Cl<sub>2</sub>) *m/z*: ((M+H)<sup>+</sup>) calcd for C<sub>35</sub>H<sub>60</sub>S<sub>2</sub>O<sub>2</sub>Sn<sub>2</sub>, 814.4; found, 815.2.

**Synthesis of spiro[4H-cyclopenta[2,1-b:3,4-b']dithiophene-4,2'-[1,3]dioxolane], 2,6-bis-(5-perfluorohexyl carbonylthien-2-yl) (10).** A mixture of compound **6** (2.00 g, 2.46 mmol), compound **3** (2.50 g, 4.91 mmol), and Pd[PPh<sub>3</sub>]<sub>4</sub> (0.193 g, 0.167 mmol) in dry DMF (60 mL) was stirred at 90°C for 6 h. After 15 min a purple solid precipitated. Filtration of the red solution left the disubstituted product as a dark green solid (2.18 g, 81.04 % yield). The solid was washed with ether (3 x 20 mL) and hexane (3 x 10 mL), dried overnight in vacuum oven, and purified by gradient sublimation: mp 218 °C; <sup>1</sup>H NMR (CDCl<sub>3</sub>): δ 7.88 (2H), 7.32 (4H), 4.39 (4H); <sup>19</sup>F NMR (DMSO) -85.88 (6F), -119.69 (4H), -126.43 (8F), -127.85 (4F), -131.21 (4F); Anal. Calcd for C<sub>33</sub>H<sub>10</sub>F<sub>26</sub>O<sub>4</sub>S<sub>4</sub>: C 36.27, H 0.92. Found: C 36.15, H 1.01; MS (EI, 70 eV) *m/z*: (M<sup>+</sup>) calcd for C<sub>33</sub>H<sub>10</sub>F<sub>26</sub>S<sub>4</sub>O<sub>4</sub>, 1092.4; found 1092.2.

#### Device Fabrication and Thin Film Characterization.

Prime grade *n*-doped silicon wafers (100) having 300 nm thermally grown oxide (Process Specialties Inc.) were used as device substrates. They were rinsed with water, methanol, and acetone before film deposition. Trimethylsilyl functionalization of the Si/SiO<sub>2</sub> surface was carried out by exposing the silicon wafers to hexamethyldisilazane (HMDS) vapor at room temperature in a closed container under nitrogen overnight. Organic compounds were deposited by either vacuum evaporation (pressures < 10<sup>-5</sup> Torr) at a growth rate of 0.2-0.3 Ås<sup>-1</sup>, or by casting films from THF solutions (concentrations 200 - 400 ppm, 10<sup>-4</sup> - 10<sup>-2</sup> M). Evaporated films were 500 Å thick (as determined by a calibrated in situ quartz crystal monitor), and solution-cast films were variable and thicker, on the order of microns. For solution depositions, a region of the substrate surface (~1-2 cm<sup>2</sup>) was defined using 3M Novec™ EGC-1700 electronic coating (comparable to the previously used 3M FC-722 product) before casting. The room temperature or warm solution was transferred inside the defined area and allowed to evaporate, with no special care taken to avoid dust in the environment (a clean hood is optional). For FET device fabrication, top-contact electrodes (500 Å) were deposited by evaporating gold (pressure < 10<sup>-5</sup> Torr); channel dimensions were 50/100 μm (L) by 5.0 mm (W). The capacitance of the insulator is 2 x 10<sup>-8</sup> F/cm<sup>2</sup> for 300 nm SiO<sub>2</sub>. TFT device measurements were carried out in a customized vacuum probe station (8 x 10<sup>-5</sup> Torr) or in air. Coaxial and/or triaxial shielding was incorporated into Signatone probe stations to minimize the noise level. TFT characterization was performed with a Keithly 6430 subfemtoammeter and a Keithly 2400 source meter, operated by a locally written Labview program and GPIB communication.

Thin films were analyzed by X-ray film diffractometry (XRD), using standard  $\theta$  -  $2\theta$  techniques, with Cu K $\alpha$  radiation and a monochromator. All  $\theta$  -  $2\theta$  scans were calibrated in situ with the reflection of the Si (100)

substrates. Films were coated with 3 nm of sputtered Au before analysis by scanning electron microscopy (SEM) using a Hitachi S4500 FE microscope.

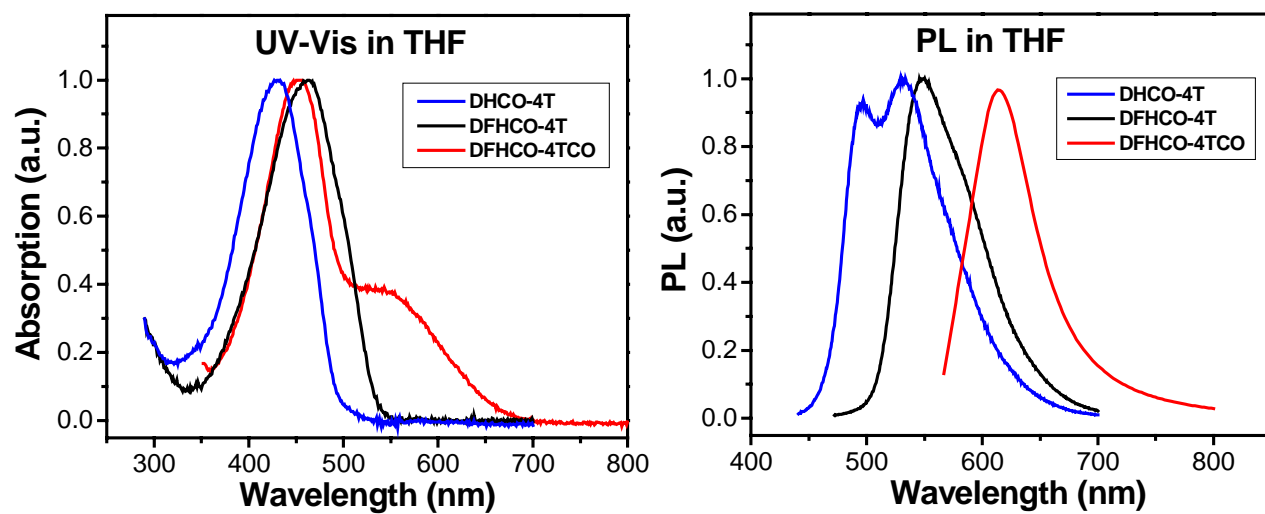

*Figure S1.* UV-vis/Photoluminescence (PL) spectra of **DHCO-4T**, **DFHCO-4T** and **DFHCO-4TCO**.

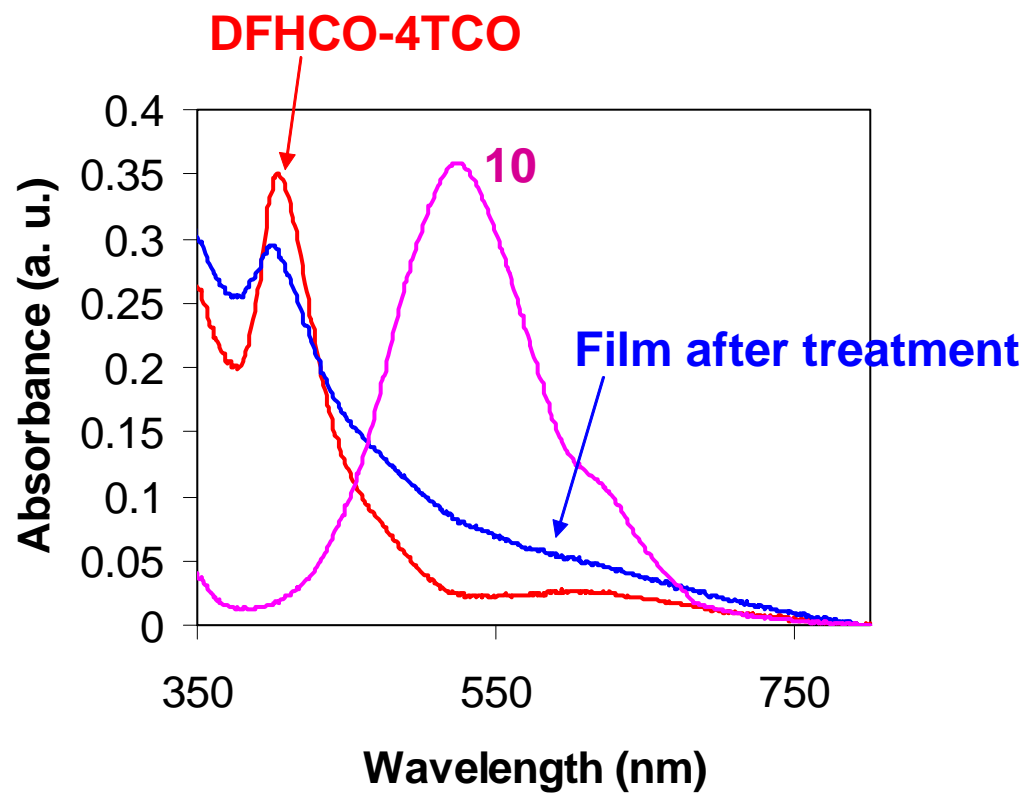

**Figure S2.** UV-Vis spectra of **DFHCO-4TCO** (red) and **10** (pink) films and that of film **10** after H<sub>2</sub>O-HCl vapor treatment and annealing.
